# Supplementary material for: China's Clean Air Action has suppressed unfavorable influences of climate on wintertime PM 2.5 concentrations in Beijing since 2002
Source: Copernicus journal article supplement (doi:10.5194/acp-2019-325), 2019-05-23
Supplement: Supplementary file 1 [file acp-2019-325-supplement.pdf]

Supplement of

## China's Clean Air Action has suppressed unfavorable influences of climate on wintertime PM<sub>2.5</sub> concentrations in Beijing since 2002

Meng Gao et al.

Correspondence: Meng Gao ([mmgao2@hkbu.edu.hk](mailto:mmgao2@hkbu.edu.hk)), Zifa Wang ([zifawang@mail.iap.ac.cn](mailto:zifawang@mail.iap.ac.cn)) and Michael B. McElroy ([mbm@seas.harvard.edu](mailto:mbm@seas.harvard.edu))

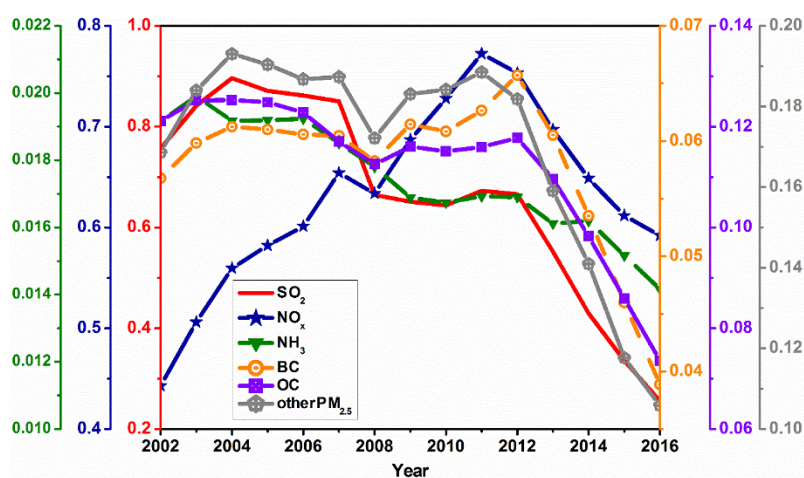

Fig. S1. Trends of wintertime emissions of air pollutants (SO<sub>2</sub>, NO<sub>x</sub>, NH<sub>3</sub>, BC, OC, and other PM<sub>2.5</sub>, unit: 10<sup>6</sup> Mg) in Beijing-Tian-Hebei region from 2002 to 2016.

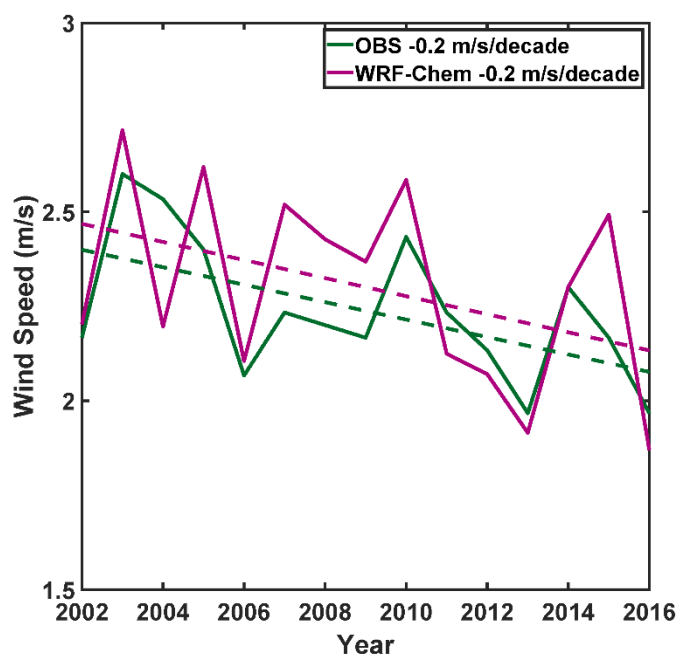

Fig. S2. Simulated and observed winter mean wind speeds in Beijing and the declining rates.
